# Supplementary material
Source: ML conference proceedings conference paper supplement (https://proceedings.neurips.cc/paper_files/paper/2020/hash/5f8b73c0d4b1bf60dd7173b660b87c29-Abstract.html)
Supplement: Supplementary file [file 5f8b73c0d4b1bf60dd7173b660b87c29-Supplemental.zip]

adv 0: overall

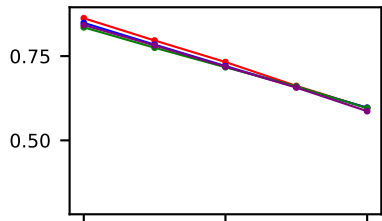

adv 0: &gt;50K aframer

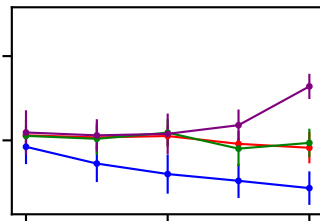

adv 0: &gt;50K, not aframer

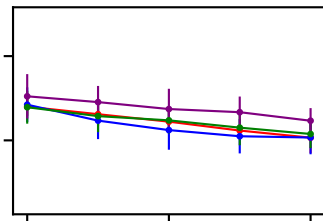

adv 1: overall

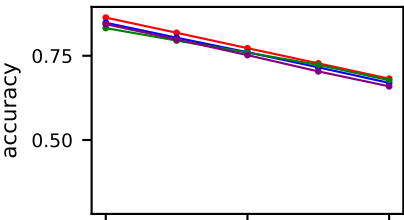

adv 1: &gt;50K female

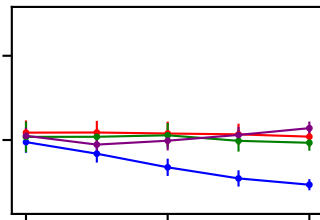

adv 1: &gt;50K, not female

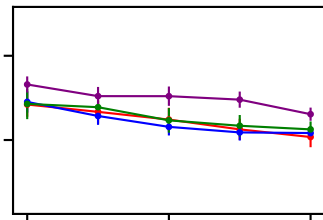

adv 2: overall

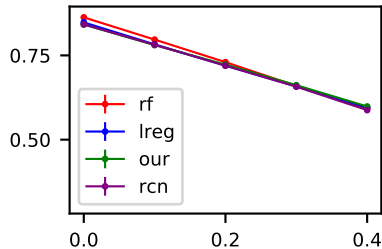

adv 2: &gt;50K immigrant

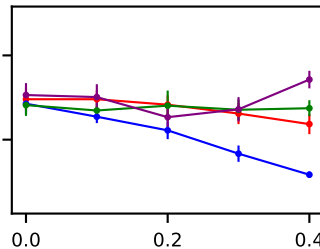

adv 2: &gt;50K, not immigrant

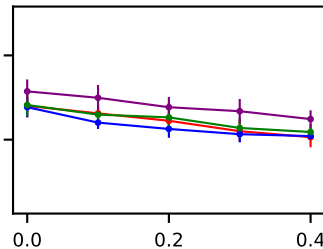noise rate  $\eta$
