# Supplementary material
Source: ML conference proceedings conference paper supplement (https://proceedings.neurips.cc/paper_files/paper/2020/hash/5f8b73c0d4b1bf60dd7173b660b87c29-Abstract.html)

RCN

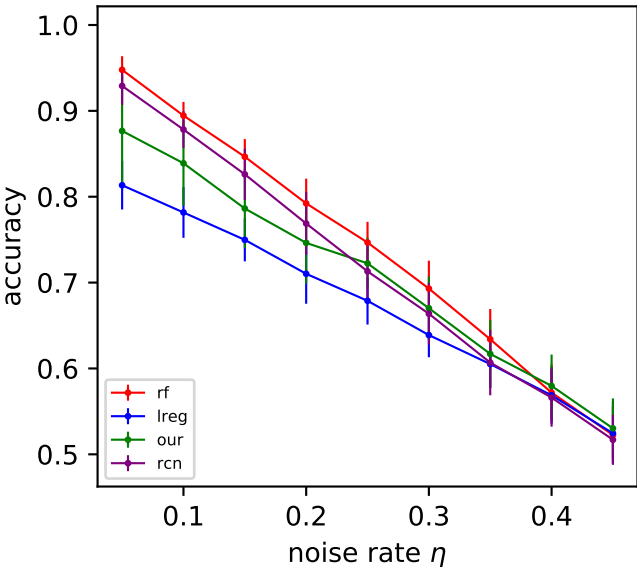

Massart

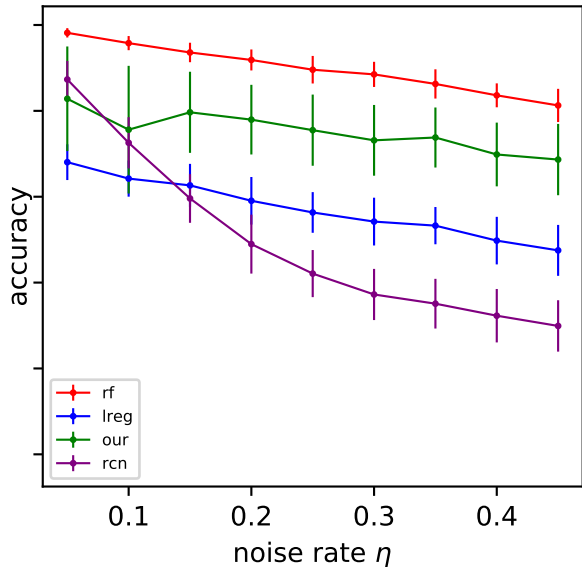

Supplement: Supplementary file [file 5f8b73c0d4b1bf60dd7173b660b87c29-Supplemental.zip]
